# Supplementary material for: The impact of residual solvent on catholyte performance in solid-state batteries
Source: Royal Society of Chemistry journal article supplement (doi:10.1039/d2ta04847g), 2022-01-01
Supplement: d2ta04847g1.pdf [file d2ta04847g1.pdf]

Supporting information

## **The Impact of Residual Solvent on Catholyte Performance in Solid-State Batteries**

Fengyu Shen<sup>a\*</sup>, Robert A. Jonson<sup>a</sup>, Michael C. Tucker<sup>a\*</sup>

<sup>a</sup>Energy Storage and Distributed Resources Division, Lawrence Berkeley National Laboratory, Berkeley, CA 94720, United States

\*: Author to whom correspondence should be addressed.

Email: [fshen@lbl.gov](mailto:fshen@lbl.gov) (F.Shen) [mctucker@lbl.gov](mailto:mctucker@lbl.gov) (M.C. Tucker)

This file includes:

Fig. S1. A typical EIS spectrum for LLZO electrolyte at room temperature

Fig. S2. Cathode appearance evolution during 7 min drying process

Fig. S3. Quantification of residual NMP loading

Fig. S4. EIS of a full cell with cathode drying at 100 °C overnight under vacuum.

Fig. S5. EIS of a LLZO pellet before and after soaking in PVDF/LiTFSI/NMP for 20 h

Fig. S6. Synchrotron X-ray tomography 3D reconstruction image of a cathode

Fig. S7. Discharge capacity cycled at 0.1 C, 0.2 C and 0.5 C with cycling time.

Fig. S8. Full cell performance at 60 °C

Fig. S9. Hybrid full cell performance at 25 °C

Fig. S10. Current-time curve under DC polarization

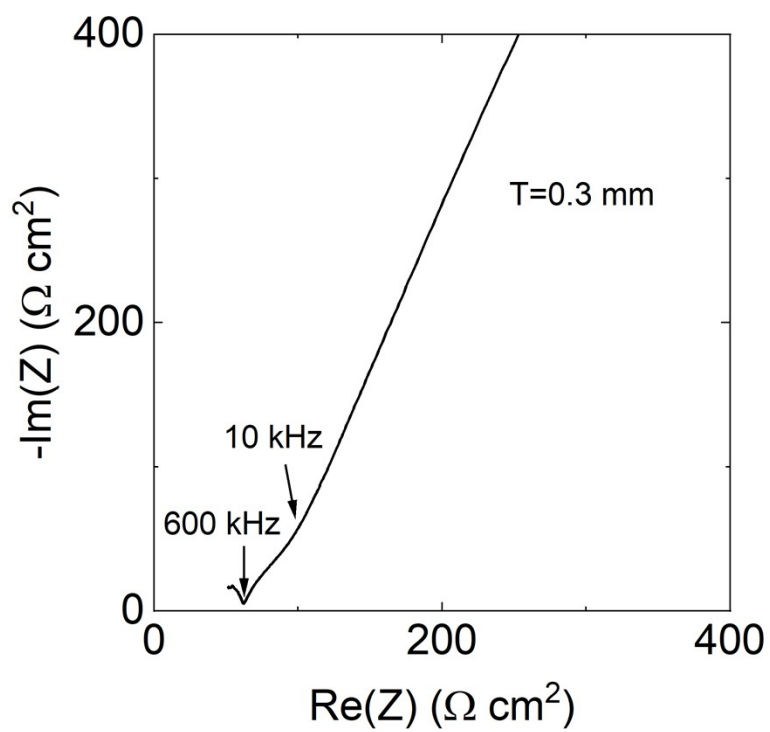

**Figure S1.** A typical EIS spectrum for LLZO electrolyte at room temperature with Au electrodes.

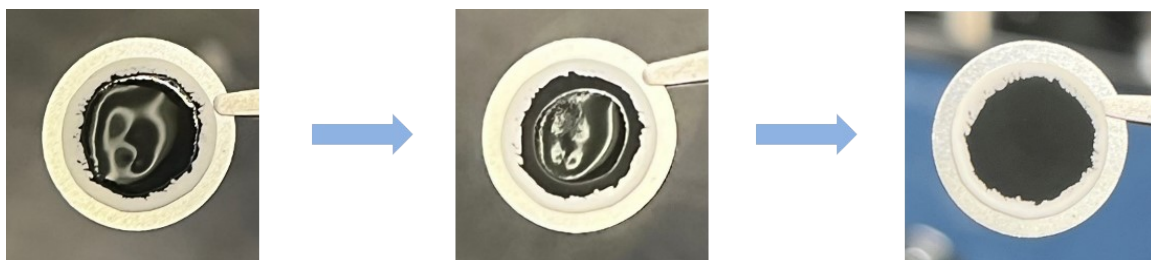

**Figure S2.** Cathode appearance evolution during 7 min drying process.

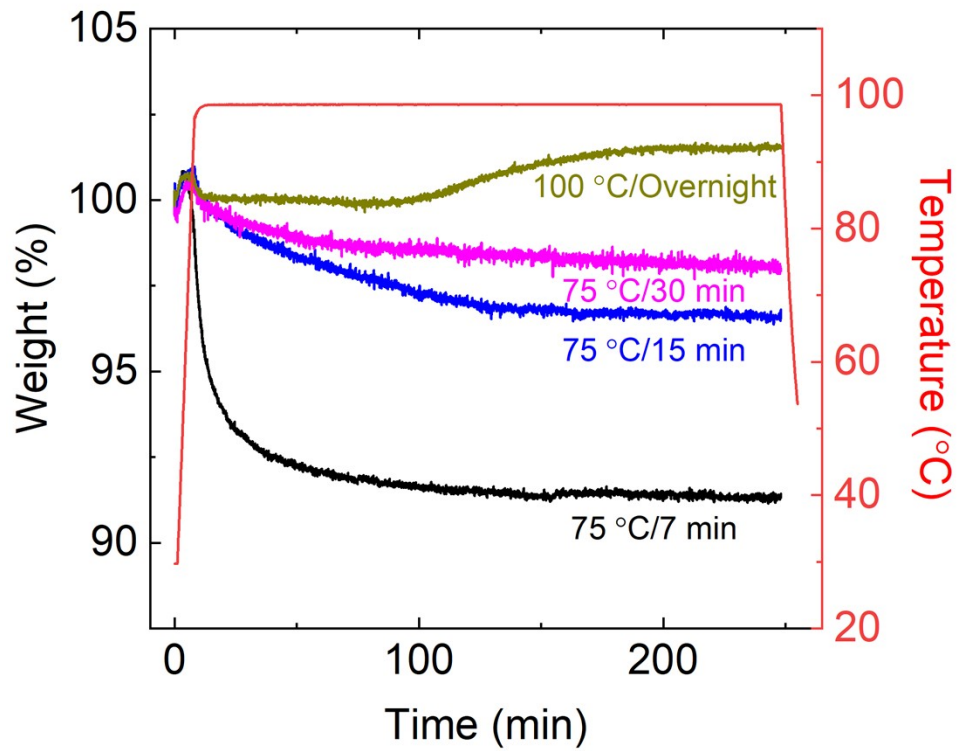

**Figure S3.** Analysis of residual NMP loading by thermogravimetric analysis (TGA) in argon atmosphere.

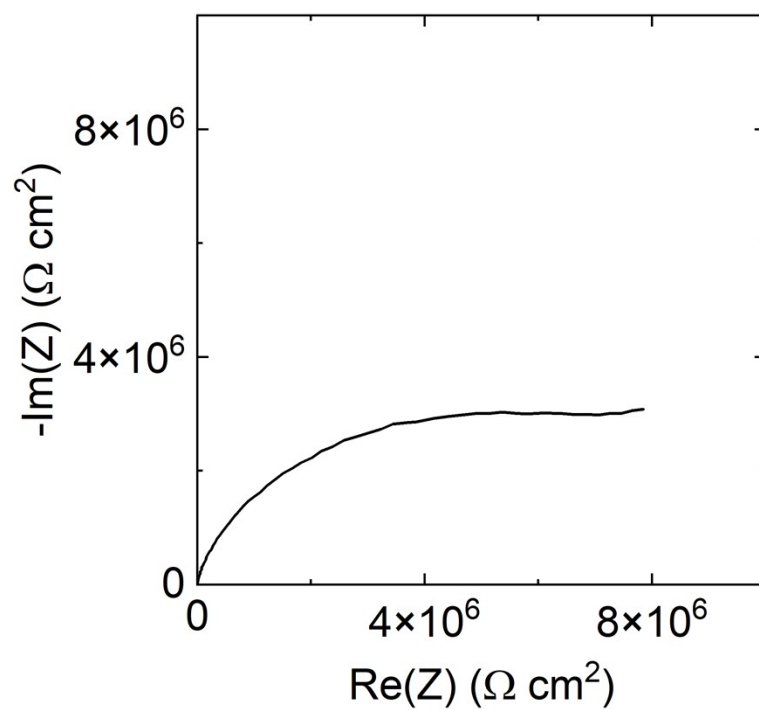

**Figure S4.** EIS of a full cell with cathode drying at 100 °C overnight under vacuum.

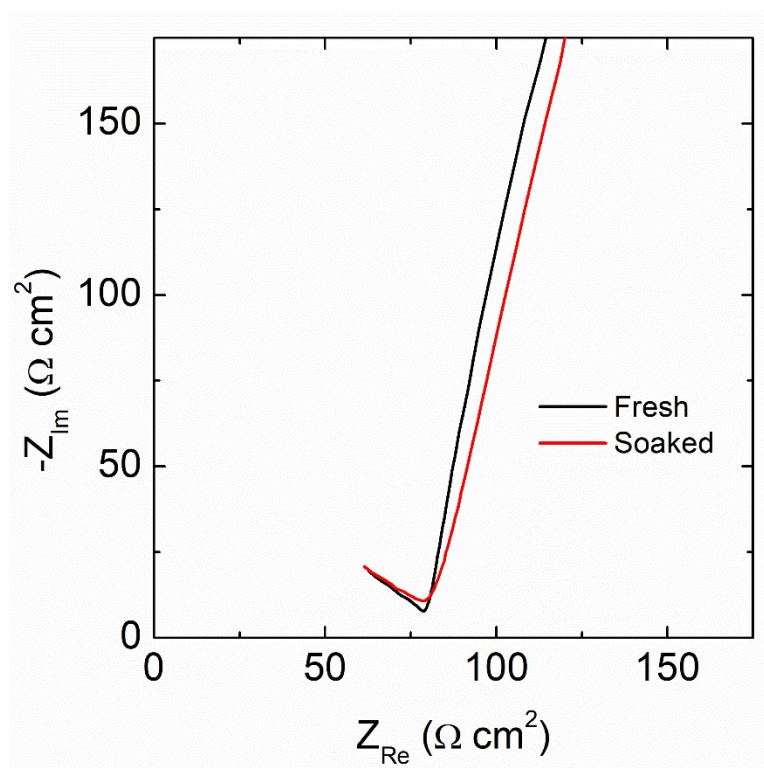

**Figure S5.** EIS of a LLZO pellet before and after soaking in PVDF/LiTFSI/NMP solution for 20 h, showing no degradation.

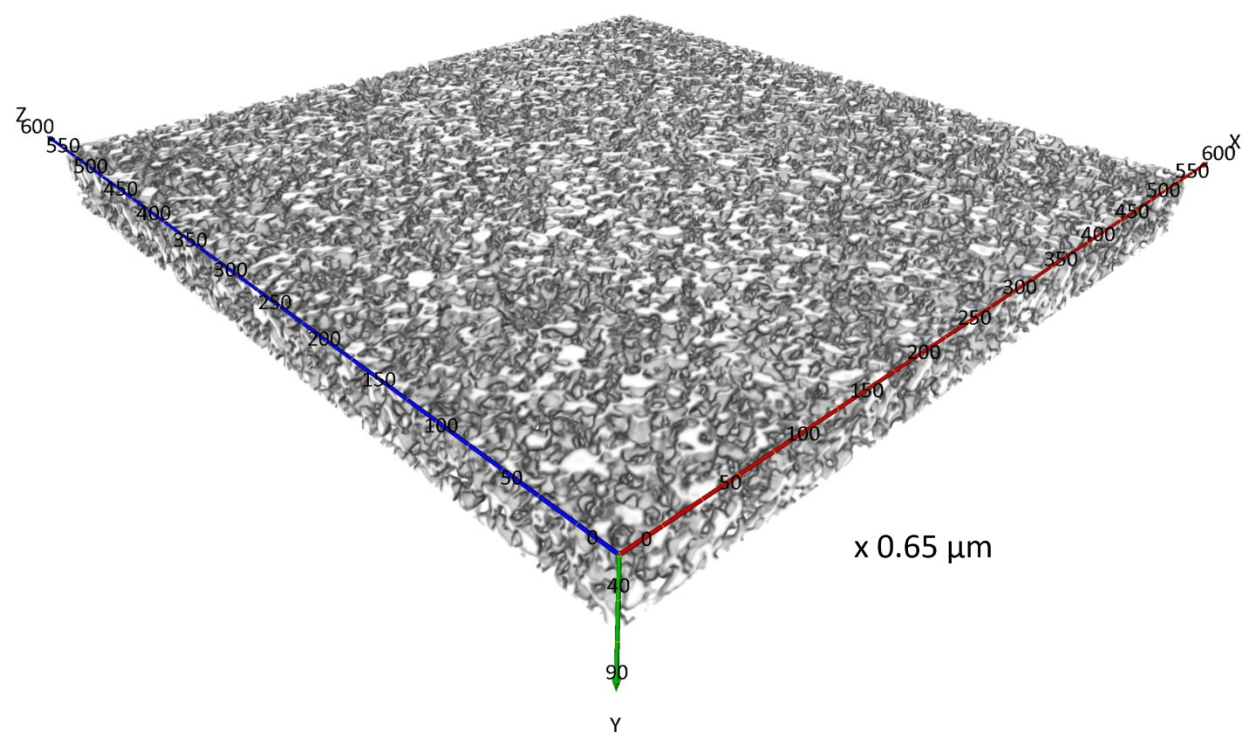

**Figure S6.** Synchrotron X-ray tomography 3D reconstruction image of the cathode with 8.5% LiTFSI.

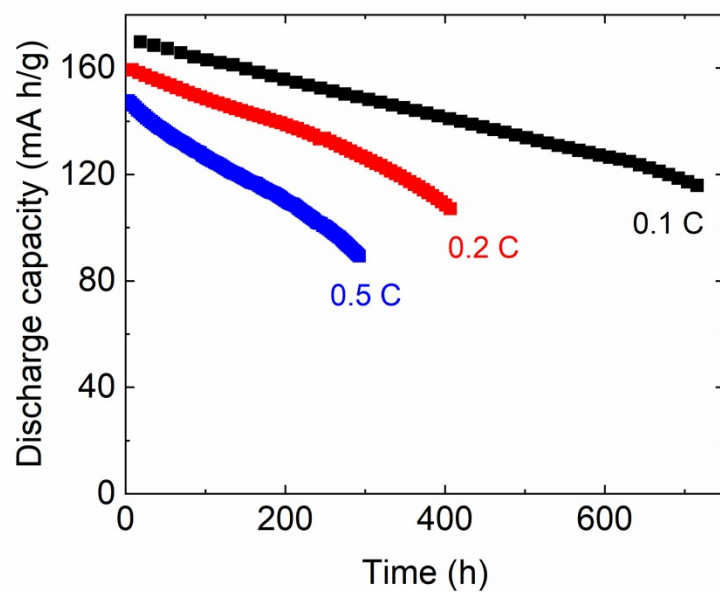

**Figure S7.** Discharge capacity cycled at 0.1 C, 0.2 C and 0.5 C with cycling time.



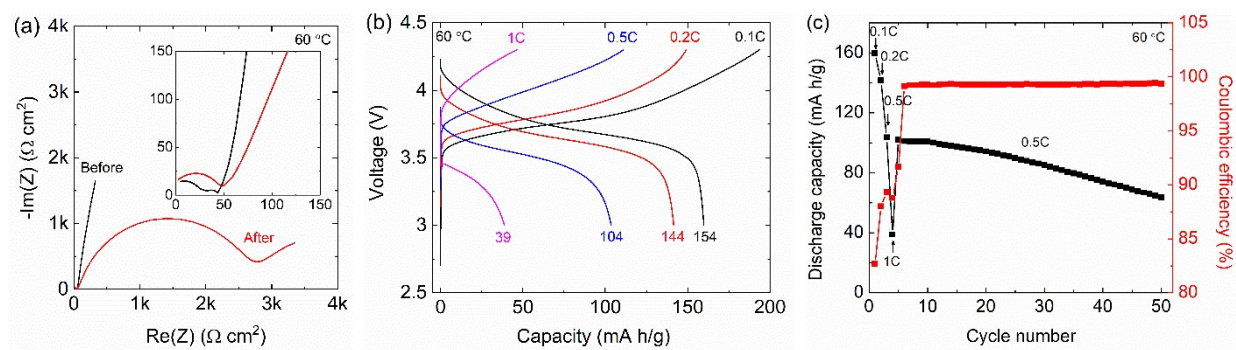

**Figure S8.** Full cell performance at 60 °C. (a) EIS before and after cycling; (b) Charge/discharge curves at 0.05 C, 0.1 C, 0.2 C, and 0.5 C; (c) Discharge capacity and coulombic efficiency versus cycle number.

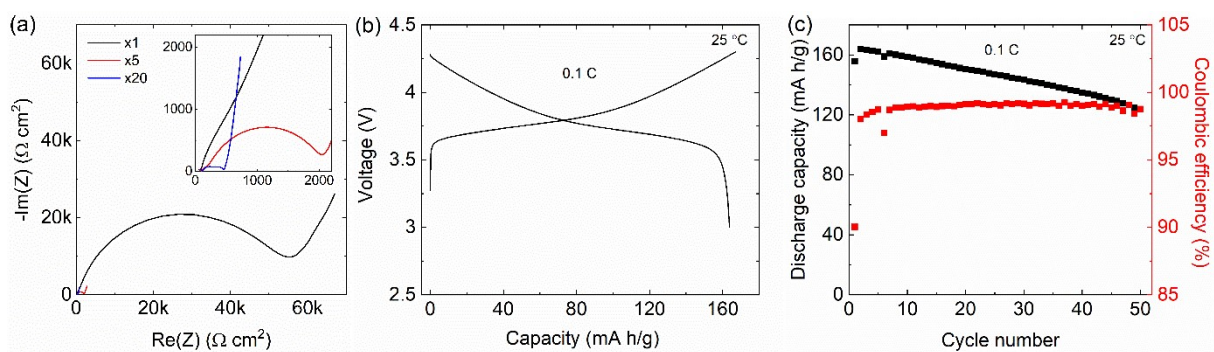

**Figure S9.** Hybrid full cell performance at 25 °C with cathodes completely dried of NMP, followed by addition of liquid electrolyte (1 M  $\text{LiPF}_6$  in EC/DMC/DEC). (a) EIS before cycling with various amount of liquid electrolyte (1, 5, and 20 times of NMP residue by weight); (b) Charge/discharge curves at 0.1 C; (c) Discharge capacity and coulombic efficiency versus cycle number of the cell with liquid electrolyte (20 times of NMP residue).

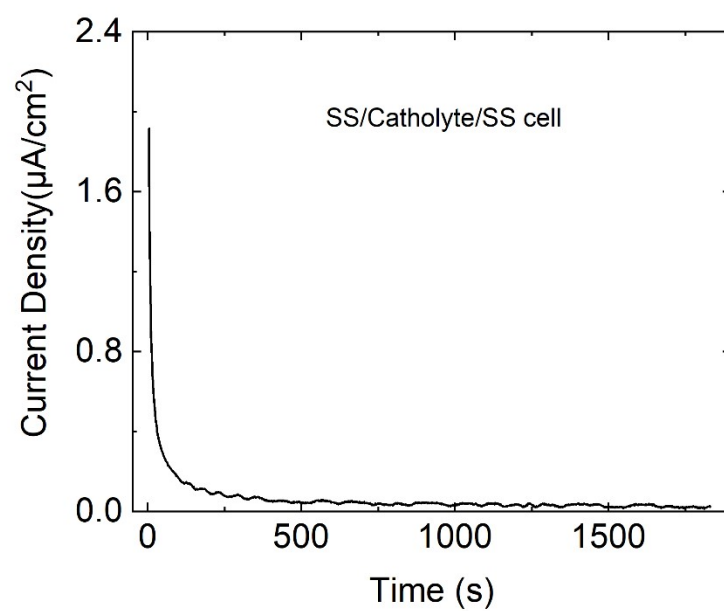

**Figure S10.** Current density-time curve of the SS/catholyte/SS cell under DC polarization at 0.5 V.
